# Supplementary material
Source: PubMed Central journal article supplement (PMC1698594)
Supplement: bj4000485add.pdf [file bj4000485add.pdf]

Figure 1S.

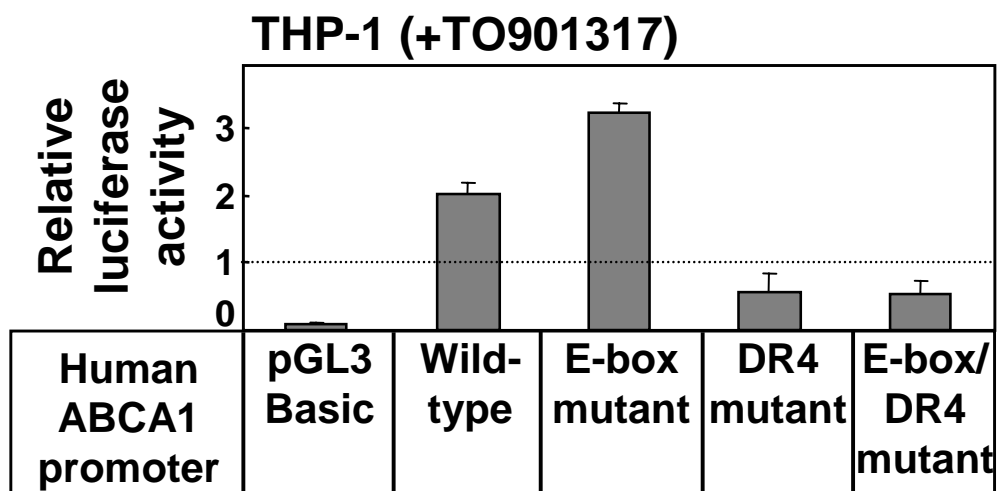

FIGURE 1S. Human ABCA1 promoter activity in THP-1 macrophages stimulated with a synthetic LXR ligand. PMA-differentiated THP-1 human macrophages were transiently transfected with phRL-TK Renilla internal control plasmid together with either pGL3-basic vector or pGL3-hABCA1: wild-type or containing mutations in the E-box, DR4, or both; and stimulated with TO901317. Luciferase activity was normalized for transfection efficiency with the phRL-TK Renilla internal control. Data are presented relative to the wild-type construct, vehicle-treated control condition, and are mean+SEM (n=3-4 separate experiments).
